# Supplementary material for: Solanum melongena L. Extract Protects Retinal Pigment Epithelial Cells from Blue Light-Induced Phototoxicity in In Vitro and In Vivo Models
Source: PubMed Central journal article supplement (PMC7912168; doi:10.3390/nu13020359), 2021-01-25
Supplement: nutrients-13-00359-s001.pdf [file nutrients-13-00359-s001.pdf]

## Supplementary Information

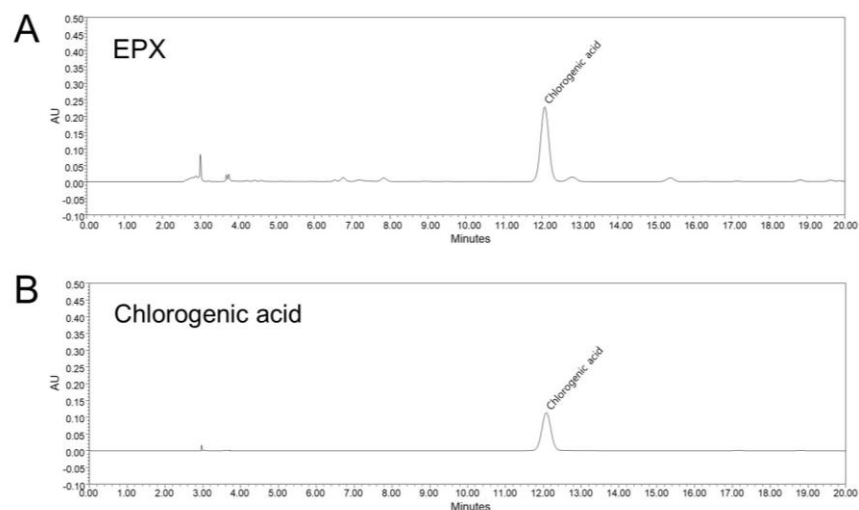

**Supplementary Figure S1.** HPLC chromatogram of chlorogenic acid from EPX. Chromatograms of (A) EPX and (B) chlorogenic acid as standard compound. Absorbance was measured at 310 nm wavelength.

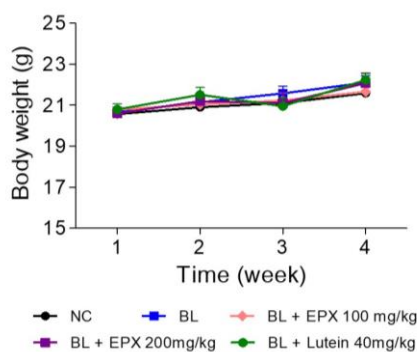

**Supplementary Figure S2.** Changes in the body weight of mice in animal model.

**Supplementary Table S1.** Primer sequences for RT-qPCR

| Name           | Forward                    | Reverse                 |
|----------------|----------------------------|-------------------------|
| <i>ATF3</i>    | GCTGTCACCACGTGCAGTATCTCA   | CTGTTCTCCTCTTGCTGACAAGC |
| <i>XBPIs</i>   | TGCTGAGTCCGCAGCAGGTG       | GCTGGCAGGCTCTGGGGAAG    |
| <i>HERPUD1</i> | CGTTGGGTGGTTTCCATTA        | TGGTTGGGGTCTTCAGTTTC    |
| <i>DDIT3</i>   | CTAGTGCCAATGATGTGA         | ATATACAAGCTGAGACCTT     |
| <i>TRIB3</i>   | GAGGAGGGGAGACAGAGAAG       | TGGAAGGCACTGAAGGTT      |
| <i>HSPA5</i>   | AGCTGTAGCGTATGGTGCTG       | AAGGGGACATACATCAAGCAGT  |
| <i>CXCL8</i>   | TGAATTACGGAATAATGAGTTAGAAC | TCAACCAGCAAGAAATTACTAAT |
| <i>IL1B</i>    | CCACCTCCAGGGACAGGATA       | AACACGCAGGACAGGTACAG    |
| <i>RELA</i>    | GTGGGGACTACGACCTGAATG      | GGGGCACGATTGTCAAAGATG   |
| <i>NFKBIA</i>  | ACCTGGTGTCACTCCTGTTGA      | CTGCTGCTGTATCCGGGTG     |
| <i>18s</i>     | GAGGATGAGGTGGAACGTGT       | TCTTCAGTCGCTCCAGGTCT    |

**Supplementary Table S2. Raw values of ONL thickness from BL-induced retinal degeneration model.**[ONL thickness] ( $\mu\text{m}$ )**GROUP: G1 (n=8) NC**

| Animal ID | G1-1  |       | G1-2  |       | G1-3  |       | G1-4  |       | G1-5  |       | G1-6  |       | G1-7  |       | G1-8  |       |
|-----------|-------|-------|-------|-------|-------|-------|-------|-------|-------|-------|-------|-------|-------|-------|-------|-------|
| Left      | 49.50 | 48.11 | 40.30 | 39.36 | 52.94 | 53.54 | 45.41 | 45.94 | 58.23 | 56.23 | 48.86 | 49.41 | 47.83 | 46.57 | 43.82 | 47.26 |
| Right     | 43.73 | 44.71 | 37.05 | 38.65 | 51.28 | 51.88 | 43.74 | 44.84 | 54.06 | 45.65 | 47.08 | 49.32 | 46.17 | 46.24 | 43.51 | 47.87 |

**GROUP: G2 (n=8) Blue light**

| Animal ID | G2-1  |       | G2-2  |       | G2-3  |       | G2-4  |       | G2-5  |       | G2-6  |       | G2-7  |       | G2-8  |       |
|-----------|-------|-------|-------|-------|-------|-------|-------|-------|-------|-------|-------|-------|-------|-------|-------|-------|
| Left      | 16.87 | 16.06 | 18.60 | 20.23 | 23.51 | 21.36 | 21.54 | 20.30 | 12.15 | 12.13 | 16.72 | 15.87 | 15.23 | 16.19 | 15.87 | 17.09 |
| Right     | 15.81 | 16.63 | 20.28 | 26.28 | 22.56 | 21.71 | 22.33 | 22.38 | 12.03 | 10.96 | 14.72 | 15.86 | 16.06 | 17.48 | 13.48 | 13.29 |

**GROUP: G3 (n=8) Blue light+EPX 100mg/kg**

| Animal ID | G3-1  |       | G3-2  |       | G3-3  |       | G3-4  |       | G3-5  |       | G3-6  |       | G3-7  |       | G3-8  |       |
|-----------|-------|-------|-------|-------|-------|-------|-------|-------|-------|-------|-------|-------|-------|-------|-------|-------|
| Left      | 20.15 | 19.56 | 33.55 | 27.93 | 28.47 | 28.24 | 23.90 | 23.62 | 21.64 | 20.09 | 23.72 | 25.20 | 25.56 | 26.43 | 21.42 | 21.53 |
| Right     | 28.35 | 24.95 | 30.87 | 31.86 | 23.25 | 21.08 | 20.76 | 20.36 | 19.41 | 20.33 | 28.47 | 24.69 | 21.27 | 21.57 | 21.96 | 20.95 |

**GROUP: G4 (n=8) Blue light+EPX 200mg/kg**

| Animal ID | G4-1  |       | G4-2  |       | G4-3  |       | G4-4  |       | G4-5  |       | G4-6  |       | G4-7  |       | G4-8  |       |
|-----------|-------|-------|-------|-------|-------|-------|-------|-------|-------|-------|-------|-------|-------|-------|-------|-------|
| Left      | 23.70 | 21.21 | 22.30 | 20.08 | 24.36 | 26.58 | 28.60 | 30.28 | 26.90 | 25.29 | 29.60 | 29.82 | 26.03 | 23.85 | 24.78 | 25.62 |
| Right     | 25.30 | 24.69 | 20.83 | 23.66 | 24.52 | 25.28 | 27.86 | 26.30 | 26.61 | 25.78 | 23.65 | 22.15 | 23.86 | 25.38 | 25.50 | 25.56 |

**GROUP: G5 (n=8) Blue light+Lutein 40mg/kg**

| Animal ID | G5-1  |       | G5-2  |       | G5-3  |       | G5-4  |       | G5-5  |       | G5-6  |       | G5-7  |       | G5-8  |       |
|-----------|-------|-------|-------|-------|-------|-------|-------|-------|-------|-------|-------|-------|-------|-------|-------|-------|
| Left      | 28.73 | 31.91 | 24.06 | 24.13 | 23.49 | 23.80 | 25.34 | 23.96 | 22.72 | 21.29 | 18.40 | 19.80 | 16.51 | 18.62 | 26.80 | 25.36 |
| Right     | 32.51 | 35.30 | 23.98 | 24.92 | 23.08 | 24.34 | 24.85 | 25.54 | 23.88 | 22.53 | 22.58 | 20.82 | 21.75 | 23.62 | 25.09 | 23.89 |
